## Correction for: STAT5A induced LINC01198 promotes proliferation of glioma cells through stabilizing DGCR8

Cheng Tan<sup>1,\*</sup>, Yimeng Dai<sup>2,\*</sup>, Xiaoyang Liu<sup>1</sup>, Guifang Zhao<sup>3,4</sup>, Weiyao Wang<sup>3,4</sup>, Jia Li<sup>1</sup>, Ling Qi<sup>3,4</sup>

<sup>1</sup>Department of Neurology, China-Japan Union Hospital of Jilin University, Changchun 130033, Jilin, PR.China

<sup>2</sup>Department of Radiology, China-Japan Union Hospital of Jilin University, Changchun 130033, Jilin, PR.China

<sup>3</sup>The Sixth Affiliated Hospital of Guangzhou Medical University, Qingyuan People's Hospital, Qingyuan 511518, PR.China

<sup>4</sup>Department of Pathophysiology, Jilin Medical University, Jilin 132013, PR. China

\*Equal contribution

Correspondence to: Jia Li, Ling Qi; email: [dr\\_liangliu@foxmail.com](mailto:dr_liangliu@foxmail.com), [qilingip@126.com](mailto:qilingip@126.com)

Original article: *Aging (Albany NY)* 2020; 7: pp 5675-5692

PMID: [32246817](https://pubmed.ncbi.nlm.nih.gov/32246817/)

PMCID: [PMC7185146](https://pubmed.ncbi.nlm.nih.gov/PMC7185146/)

doi: [10.18632/aging.102938](https://doi.org/10.18632/aging.102938)

**This article has been corrected:** Figure 2F has a new panel summarizing results from the T87G/sh-LINC01198 mouse group, which replaced the duplicated panel for the T87G/sh-scramble group. There are also new panels for the Hs 686 control group and the overexpressing LINC01198 group because of the accidental duplication of the original panels. The corrected Figure 2F was produced using the original data. These corrections do not change the content of the publication and do not affect the conclusion drawn from this research.

The corrected Figure 2F is given below.

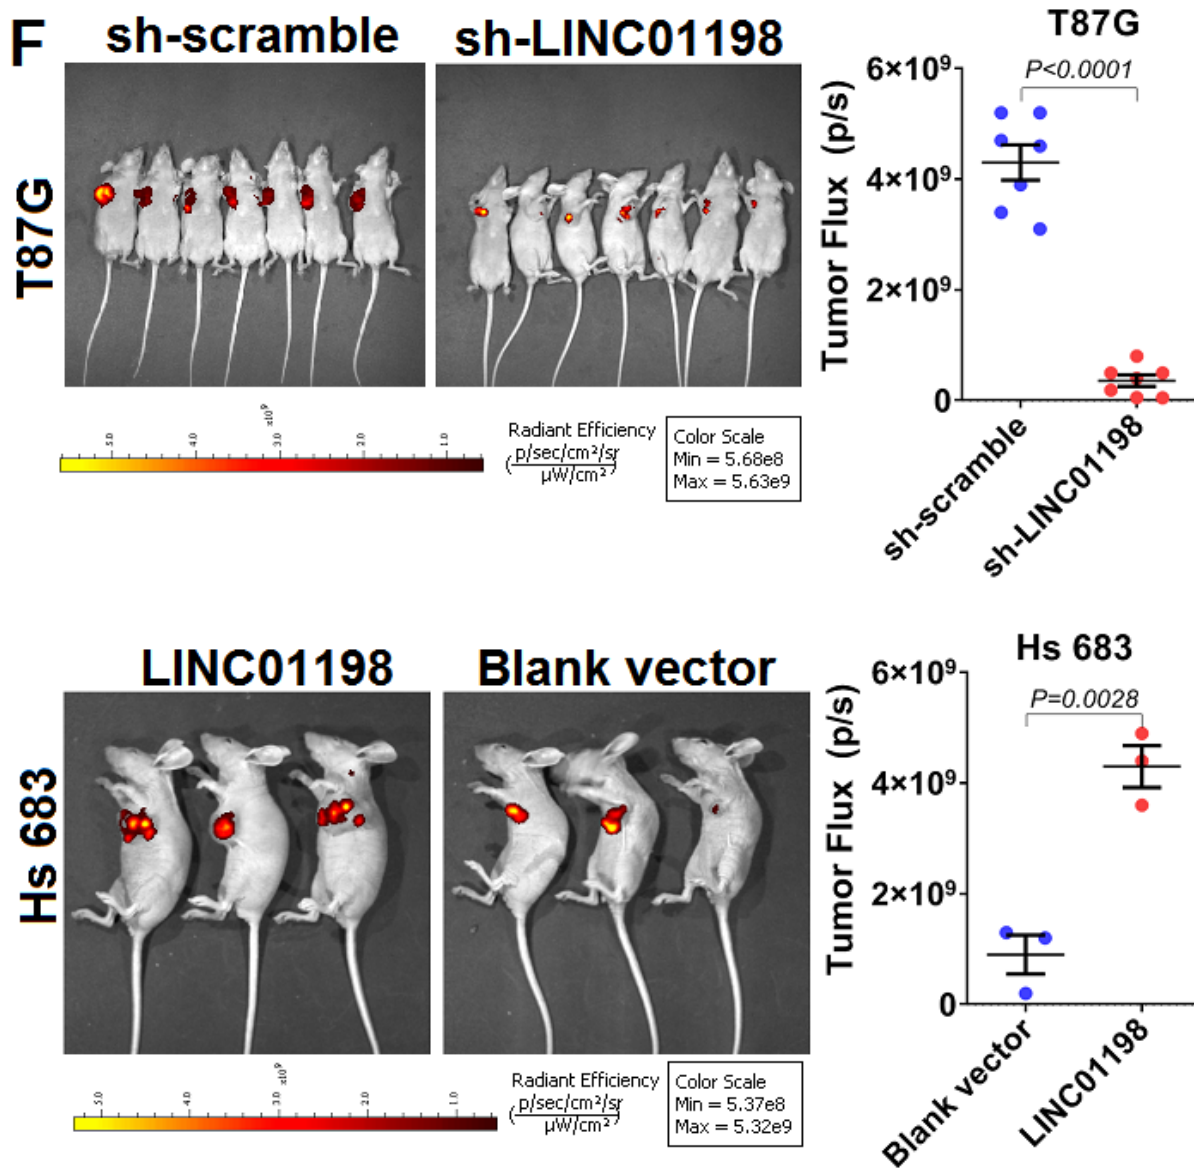

**Figure 2. LINC01198 enhanced proliferation and invasion of glioma cells.** (F) Subcutaneous xenograft nude mice model was used to verify the proliferative variation of glioma cells whose LINC01198 was being stably knocked down (T87G) or over-expressed (Hs 683). Two tailed, unpaired T-test was used to analyze the significant difference (T87G,  $t=9.456$ ,  $df=12$ ,  $P<0.0001$ ; Hs 683,  $t=4.003$ ,  $df=4$ ,  $P=0.0161$ ).
